# Supplementary material for: Oxygen vacancies and CDs synergistically mediated CD/TiO2 composite materials: investigation of electronic energy band structure modulation, photocatalytic performances, and mechanisms
Source: Royal Society of Chemistry journal article supplement (doi:10.1039/d5tc01322d), 2025-01-01
Supplement: d5tc01322d1.pdf [file d5tc01322d1.pdf]

## Supporting information

**Oxygen vacancies and CDs synergistically mediated CDs/TiO<sub>2</sub> composite materials: Investigation of electronic energy band structure modulation, photocatalytic performances, and mechanisms**

**Dahui Feng<sup>a</sup>, Han Zhao<sup>a</sup>, Yanhua Song<sup>a</sup>, Ruyan Xie<sup>a</sup>, Xiaozhen Zhang<sup>a</sup>, Shuzhe Zhang<sup>a</sup>, Peng Chen<sup>\*b</sup> and Haifeng Zou<sup>\*a</sup>**

<sup>a</sup> College of Chemistry, Jilin University, Qianjin Street 2699, Changchun 130012, China.

E-mail: [haifengzou0431@sohu.com](mailto:haifengzou0431@sohu.com)

<sup>B</sup> The Second Hospital of Jilin University, Jilin University, Yatai Street 4026, Changchun 130022, China.

E-mail: [c\\_p@jlu.edu.cn](mailto:c_p@jlu.edu.cn)

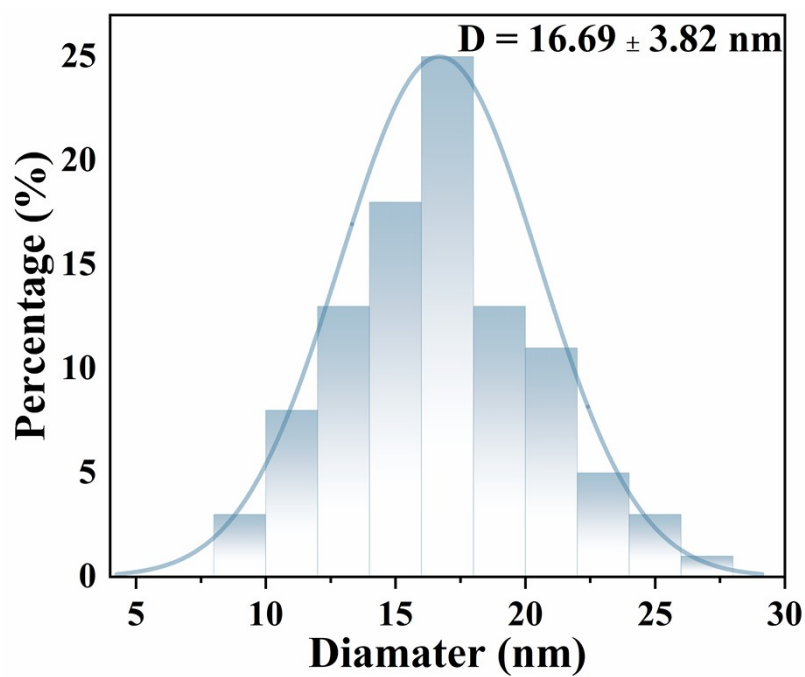

**Fig. S1.** Column diagram of DT dimension analysis in TEM.

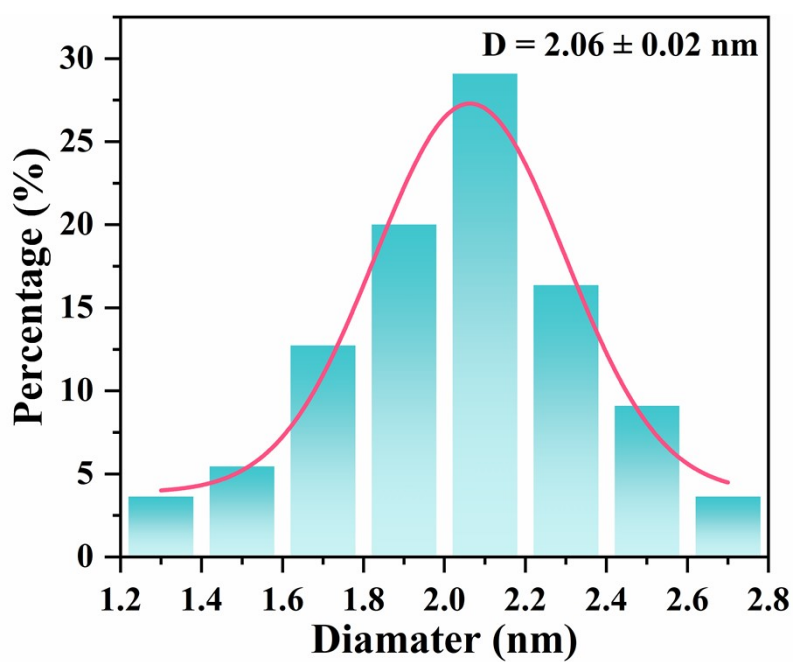

**Fig. S2.** Particle size analysis of CDs on the surface of CDT in transmission electron microscopy.

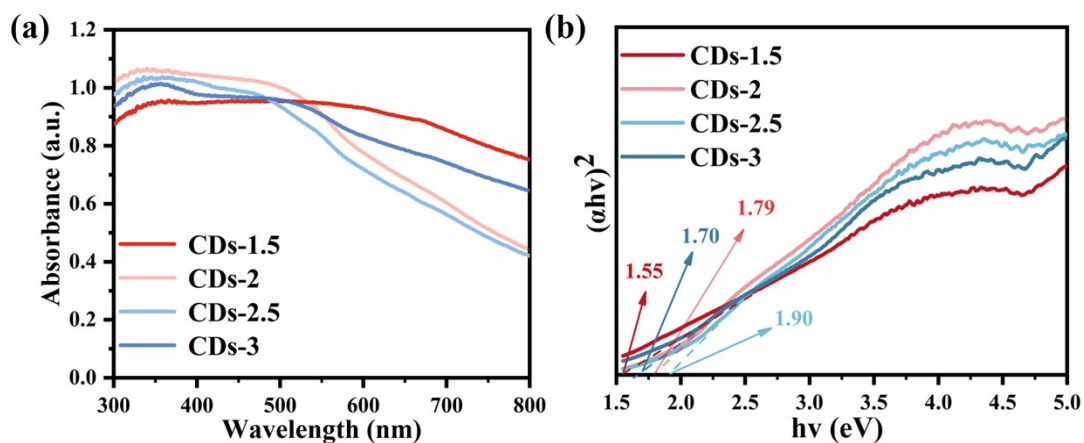

**Fig. S3.** (a) UV-visible diffuse reflection spectra of CDs synthesized with different amounts of citric acid (1.5, 2.0, 2.5 and 3.0 g); (b) Plots of the band-gap values.

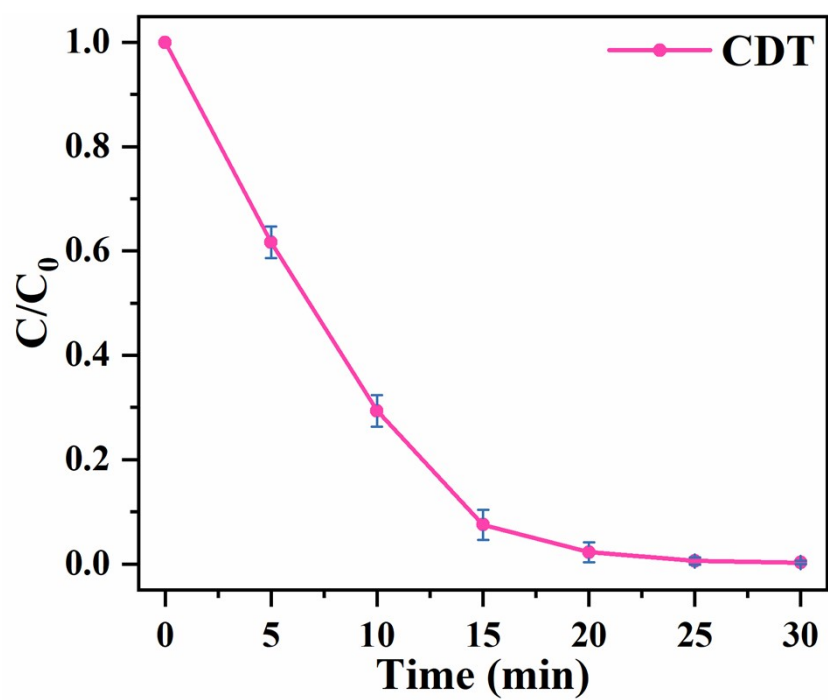

**Fig. S4.** Visible light degradation curve of RhB by CDT.

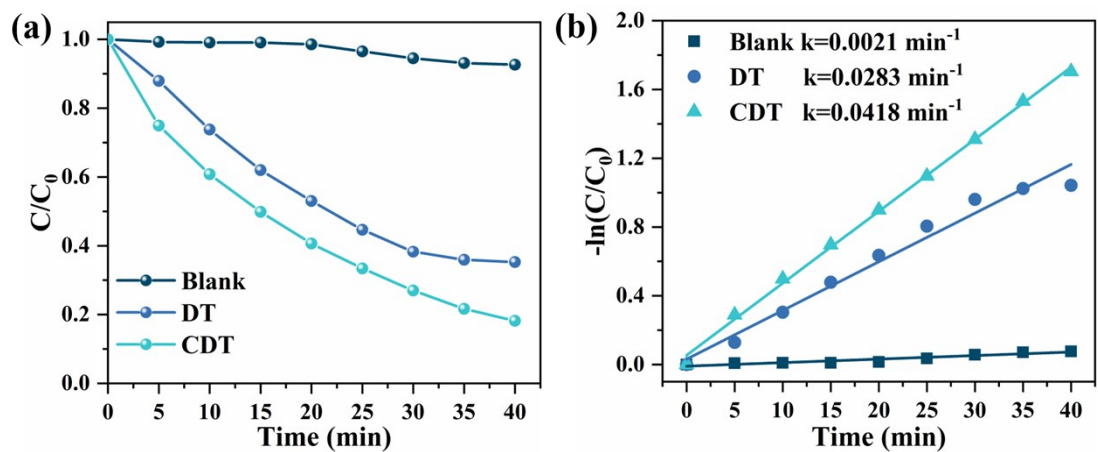

**Fig. S5.** (a) Degradation curves of Blank, DT, and CDT on 20 mg/L TC under visible light illumination; (b) Reaction kinetics curve.

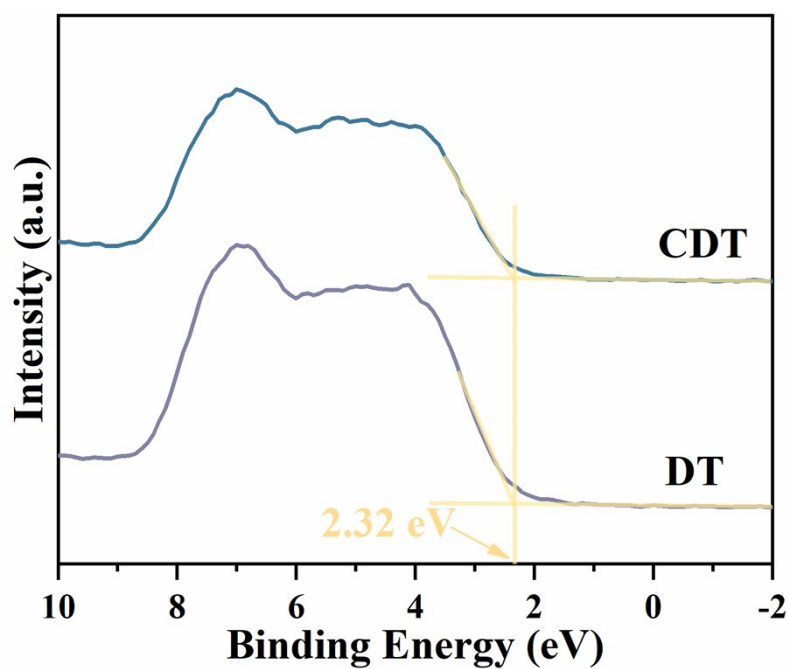

**Fig. S6.** XPS valence band spectra of DT and CDT.

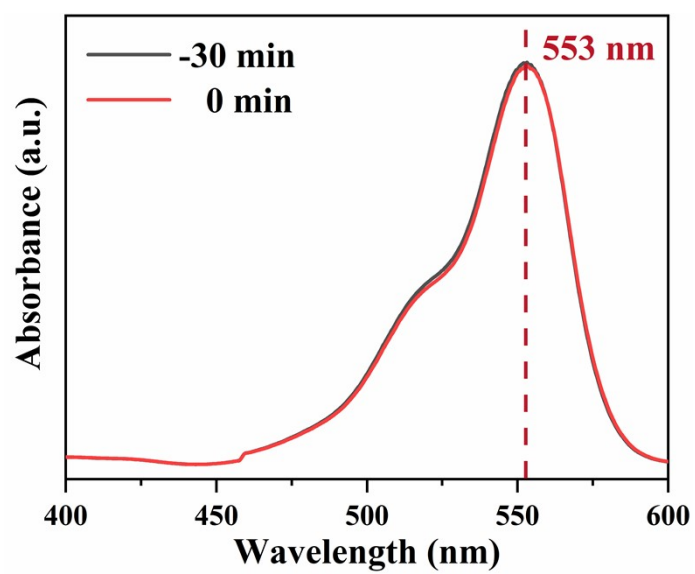

**Fig. S7.** Changes of RhB absorbance before and after dark state adsorption.
